# Supplementary material
Source: MDPI journal article supplement (https://www.mdpi.com/2308-3417/9/2/32)
Supplement: s1 [file s1]

## Supplementary Material

**Table S1.** Version 2 of the Cochrane risk-of-bias assessment tool for randomised trials: bias domains, signaling questions, response options, and risk-of-bias judgments

| Bias domain and signalling question*                                                             | Seino<br>(2017)<br>[31] | Kwon<br>(2015) [32] | Kawabata (2015)<br>[33] | Takai (2013)<br>[34] | Uemura (2018)<br>[35] | Uemura (2019)<br>[36] | Sakurai (2012)<br>[37] |
|--------------------------------------------------------------------------------------------------|-------------------------|---------------------|-------------------------|----------------------|-----------------------|-----------------------|------------------------|
| Bias arising from the randomisation process                                                      |                         |                     |                         |                      |                       |                       |                        |
| Risk-of-bias judgment (low/high/some concerns)                                                   | Low                     | Low                 | Low                     | Low                  | Low                   | Low                   | Some concerns          |
| Optional: What is the predicted direction of bias arising from the randomisation process?        |                         |                     |                         |                      |                       |                       |                        |
| Bias due to deviations from intended interventions                                               |                         |                     |                         |                      |                       |                       |                        |
| Risk-of-bias judgment (low/high/some concerns)                                                   | Low                     | Low                 | Low                     | Low                  | Low                   | Low                   | Low                    |
| Optional: What is the predicted direction of bias due to deviations from intended interventions? |                         |                     |                         |                      |                       |                       |                        |
| Bias due to missing outcome data                                                                 |                         |                     |                         |                      |                       |                       |                        |
| Risk-of-bias judgment (low/high/some concerns)                                                   | Low                     | High                | Low                     | Low                  | Low                   | Low                   | High                   |
| Optional: What is the predicted direction of bias due to missing outcome data?                   |                         |                     |                         |                      |                       |                       |                        |
| Bias in measurement of the outcome                                                               |                         |                     |                         |                      |                       |                       |                        |
| Risk-of-bias judgment (low/high/some concerns)                                                   | Low                     | Low                 | Low                     | Low                  | Low                   | Low                   | Low                    |

Optional: What is the predicted direction of bias in measurement of the outcome?

Bias in selection of the reported result  
Risk-of-bias judgment (low/high/some concerns)

Low

Low

High

Low

Low

Low

Low

Optional: What is the predicted direction bias due to selection of the reported results?

Overall bias

Risk-of-bias judgment (low/high/some concerns)

Low

High

High

Low

Low

Low

High

Optional: What is the overall predicted direction of bias for this outcome?

Y=yes; PY=probably yes; PN=probably no; N=no; NA=not applicable; NI=no information.

\* Signalling questions for bias due to deviations from intended interventions relate to the effect of assignment to intervention.

|                    | Bias arising from the randomisation process | Bias due to deviations from intended interventions | Bias due to missing outcome data | Bias in measurement of the outcome | Bias in selection of the reported result | Overall bias |
|--------------------|---------------------------------------------|----------------------------------------------------|----------------------------------|------------------------------------|------------------------------------------|--------------|
| Seino 2017 [31]    |                                             |                                                    |                                  |                                    |                                          |              |
| Kwon 2015 [32]     |                                             |                                                    |                                  |                                    |                                          |              |
| Kawabata 2015 [33] |                                             |                                                    |                                  |                                    |                                          |              |
| Takai 2013 [34]    |                                             |                                                    |                                  |                                    |                                          |              |
| Uemura 2018 [35]   |                                             |                                                    |                                  |                                    |                                          |              |
| Uemura 2018 [36]   |                                             |                                                    |                                  |                                    |                                          |              |
| Sakurai 2012 [37]  |                                             |                                                    |                                  |                                    |                                          |              |

Figure S1. Risk of bias summary

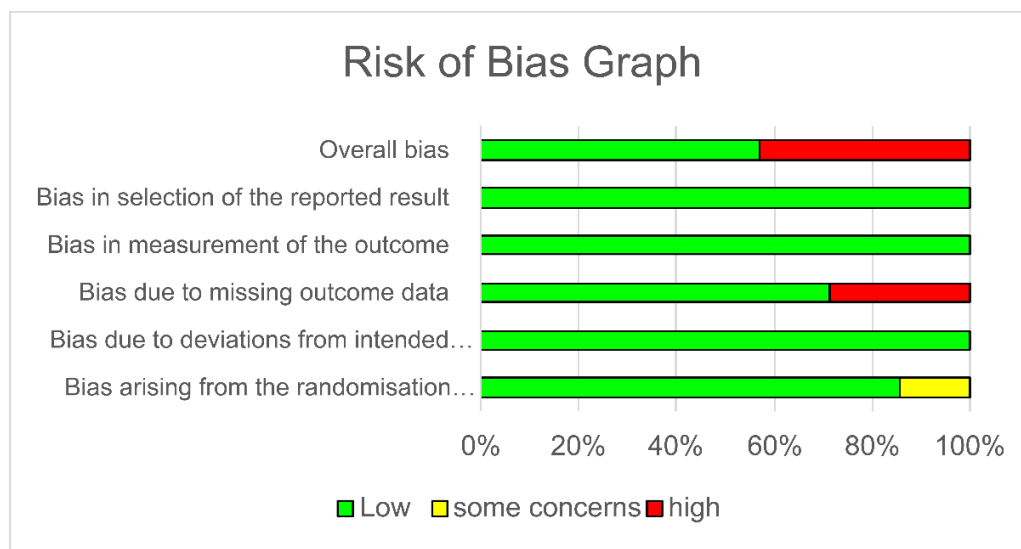

Figure S2. Risk of bias graph
